# Supplementary material for: Transition metal dichalcogenide magnetic atomic chains
Source: Royal Society of Chemistry journal article supplement (doi:10.1039/d2na00543c), 2022-01-01
Supplement: d2na00543c1.pdf [file d2na00543c1.pdf]

## Supporting Information

### Transition Metal Dichalcogenides Magnetic Atomic Chains

Kai Zhang,<sup>1</sup> Xiaojun Wu<sup>1,2,\*</sup>, and Jinlong Yang<sup>1,2</sup>

<sup>1</sup> Hefei National Research Center for Physical Sciences at the Microscale, University of Science and Technology of China, Hefei, Anhui 230026, China

<sup>2</sup> School of Chemistry and Materials Sciences, CAS Key Lab of Materials for Energy Conversion, Synergetic Innovation of Quantum Information & Quantum Technology, and CAS Center for Excellence in Nanoscience, University of Science and Technology of China, Hefei, Anhui 230026, China

\* Corresponding Email Address: [xjwu@ustc.edu.cn](mailto:xjwu@ustc.edu.cn)

## Table of Contents

Table S1: Relative energies of various nanowire configurations

Table S2: Formation energies of 1D and 2D TMDs

Figure S1: Phonon dispersion spectra of  $\text{MX}_2$  single-chain

Figure S2: AIMD simulations

Table S3: The lattice parameters and atomic coordinates of nanowires

Table S4: Formation energies of 1D chain with different stoichiometric ratio

Figure S3: Spin configurations

Table S5: Relative energies of different magnetic states

Figure S4: Spin charge density distribution

Figure S5: Projected band structures and density of states

Figure S6: Partial charge density

Figure S7: Energy difference between AFM and FM states with carrier injection

Figure S8: Band structures of  $\text{TiX}_2$  chains with carrier injection

Figure S9: Band structures of  $\text{VX}_2$  chains with carrier injection

Figure S10: Band structures of  $\text{CrS}_2$  and  $\text{MX}_2$  chains with carrier injection

Table S6: Magnetic anisotropy energy and easy magnetization axis

Figure S11: Four types of inter-chain stacking configurations

Table S7: The energies of bundles with different stacking configurations

Figure S12: Atomic structures of twisted single chain  $\text{TiS}_2$  nanowires

Figure S13: Evolution of the total energy and band gap of twisted  $\text{TiS}_2$

Figure S14: The band structure of twisted  $\text{TiS}_2$  nanowire

Table S8: Lattice mismatch and supercells of joint heterostructures

Figure S15: The evolution of binding energies

Figure S16: Separation and charge transfer between CNT and chain

Figure S17: Charge density difference in joint system

Figure S18: Spin charge density distribution in joint system

Figure S19: Projected density of states of joint system

Reference

**Table S1.** The calculated relative energies (eV/metal) of transition metal dichalcogenides (TMD) chains with different configurations.

| <b>Chain</b>            | <b>A</b> | <b>Z</b> | <b>S</b> | <b>T</b> | <b>C</b> | <b>Chain</b>            | <b>A</b> | <b>Z</b> | <b>S</b> | <b>T</b> | <b>C</b> |
|-------------------------|----------|----------|----------|----------|----------|-------------------------|----------|----------|----------|----------|----------|
| <b>TiS<sub>2</sub></b>  | 1.34     | 0.62     | 1.40     | 0        | 2.62     | <b>FeS<sub>2</sub></b>  | 0.65     | 0.22     | 0.64     | 0        | 1.59     |
| <b>TiSe<sub>2</sub></b> | 1.18     | 0.97     | 1.20     | 0        | 2.08     | <b>FeSe<sub>2</sub></b> | 0.36     | 0.12     | 0.37     | 0        | 1.15     |
| <b>TiTe<sub>2</sub></b> | 0.86     | 0.18     | 0.86     | 0        | 1.35     | <b>FeTe<sub>2</sub></b> | 0.28     | 0        | 0.36     | 0.14     | 0.77     |
| <b>VS<sub>2</sub></b>   | 1.30     | 0.90     | 1.29     | 0        | 2.59     | <b>ScS<sub>2</sub></b>  | 1.30     | 0        | 1.30     | 0.92     | 2.18     |
| <b>VSe<sub>2</sub></b>  | 1.04     | 0.68     | 1.04     | 0        | 2.15     | <b>ScSe<sub>2</sub></b> | 1.20     | 0        | 1.01     | 0.82     | 2.00     |
| <b>VTe<sub>2</sub></b>  | 0.79     | 0.18     | 0.76     | 0        | 1.52     | <b>ScTe<sub>2</sub></b> | 0.60     | 0        | 0.21     | 0.28     | 1.34     |
| <b>CrS<sub>2</sub></b>  | 1.84     | 0.66     | 1.10     | 0        | 2.11     | <b>CoS<sub>2</sub></b>  | 0.81     | 0        | 0.70     | 0.24     | 0.55     |
| <b>CrSe<sub>2</sub></b> | 1.55     | 0.65     | 0.79     | 0        | 1.41     | <b>CoSe<sub>2</sub></b> | 0.45     | 0        | 0.49     | 0.21     | 0.13     |
| <b>CrTe<sub>2</sub></b> | 0.96     | 0.10     | 0.34     | 0        | 0.53     | <b>CoTe<sub>2</sub></b> | 0.37     | 0        | 0.58     | 0.39     | 0.30     |
| <b>MnS<sub>2</sub></b>  | 1.17     | 0.29     | 0.77     | 0        | 2.16     | <b>NiS<sub>2</sub></b>  | 0.17     | 0        | 0.74     | 0.88     | 1.83     |
| <b>MnSe<sub>2</sub></b> | 0.90     | 0.08     | 0.28     | 0        | 1.47     | <b>NiSe<sub>2</sub></b> | 0.18     | 0        | 0.35     | 0.68     | 1.18     |
| <b>MnTe<sub>2</sub></b> | 0.21     | 0        | 0.15     | 0.41     | 1.07     | <b>NiTe<sub>2</sub></b> | 0.04     | 0        | 0.43     | 0.70     | 0.89     |

**Table S2.** The optimized lattice constant ( $L$ , Å), and formation energy ( $E_f$ , eV/atom) of TMD chains. The  $E_f$  of H-phase and T-phase TMD monolayers were computed for comparison.

| TMD                     | L    | $E_f$ |       |       | TMD                     | L    | $E_f$ |       |       |
|-------------------------|------|-------|-------|-------|-------------------------|------|-------|-------|-------|
|                         |      | Chain | H     | T     |                         |      | Chain | H     | T     |
| <b>ScS<sub>2</sub></b>  | 3.67 | -1.13 | -1.16 | -1.24 | <b>MnS<sub>2</sub></b>  | 5.23 | -0.41 | -0.46 | -0.56 |
| <b>ScSe<sub>2</sub></b> | 3.82 | -1.02 | -0.99 | -1.17 | <b>MnSe<sub>2</sub></b> | 5.41 | -0.23 | -0.34 | -0.47 |
| <b>ScTe<sub>2</sub></b> | 4.09 | -0.53 | -0.61 | -0.75 | <b>MnTe<sub>2</sub></b> | 3.77 | 0.01  | -0.13 | -0.22 |
| <b>TiS<sub>2</sub></b>  | 6.17 | -1.09 | -1.16 | -1.31 | <b>FeS<sub>2</sub></b>  | 5.13 | -0.26 | -0.32 | -0.37 |
| <b>TiSe<sub>2</sub></b> | 6.37 | -0.89 | -1.01 | -1.13 | <b>FeSe<sub>2</sub></b> | 5.34 | -0.15 | -0.27 | -0.31 |
| <b>TiTe<sub>2</sub></b> | 6.72 | -0.42 | -0.61 | -0.71 | <b>FeTe<sub>2</sub></b> | 3.58 | 0.07  | -0.09 | -0.11 |
| <b>VS<sub>2</sub></b>   | 5.71 | -0.76 | -0.91 | -0.90 | <b>CoS<sub>2</sub></b>  | 3.19 | -0.18 | -0.22 | -0.33 |
| <b>VSe<sub>2</sub></b>  | 5.90 | -0.58 | -0.74 | -0.68 | <b>CoSe<sub>2</sub></b> | 3.32 | -0.11 | -0.22 | -0.32 |
| <b>VTe<sub>2</sub></b>  | 6.19 | -0.15 | -0.35 | -0.09 | <b>CoTe<sub>2</sub></b> | 3.55 | 0.02  | -0.15 | -0.23 |
| <b>CrS<sub>2</sub></b>  | 5.32 | -0.45 | -0.66 | -0.52 | <b>NiS<sub>2</sub></b>  | 3.30 | -0.13 | -0.17 | -0.31 |
| <b>CrSe<sub>2</sub></b> | 5.49 | -0.27 | -0.47 | -0.43 | <b>NiSe<sub>2</sub></b> | 3.40 | -0.11 | -0.17 | -0.33 |
| <b>CrTe<sub>2</sub></b> | 5.86 | 0.16  | -0.08 | -0.16 | <b>NiTe<sub>2</sub></b> | 3.61 | 0.07  | -0.05 | -0.14 |

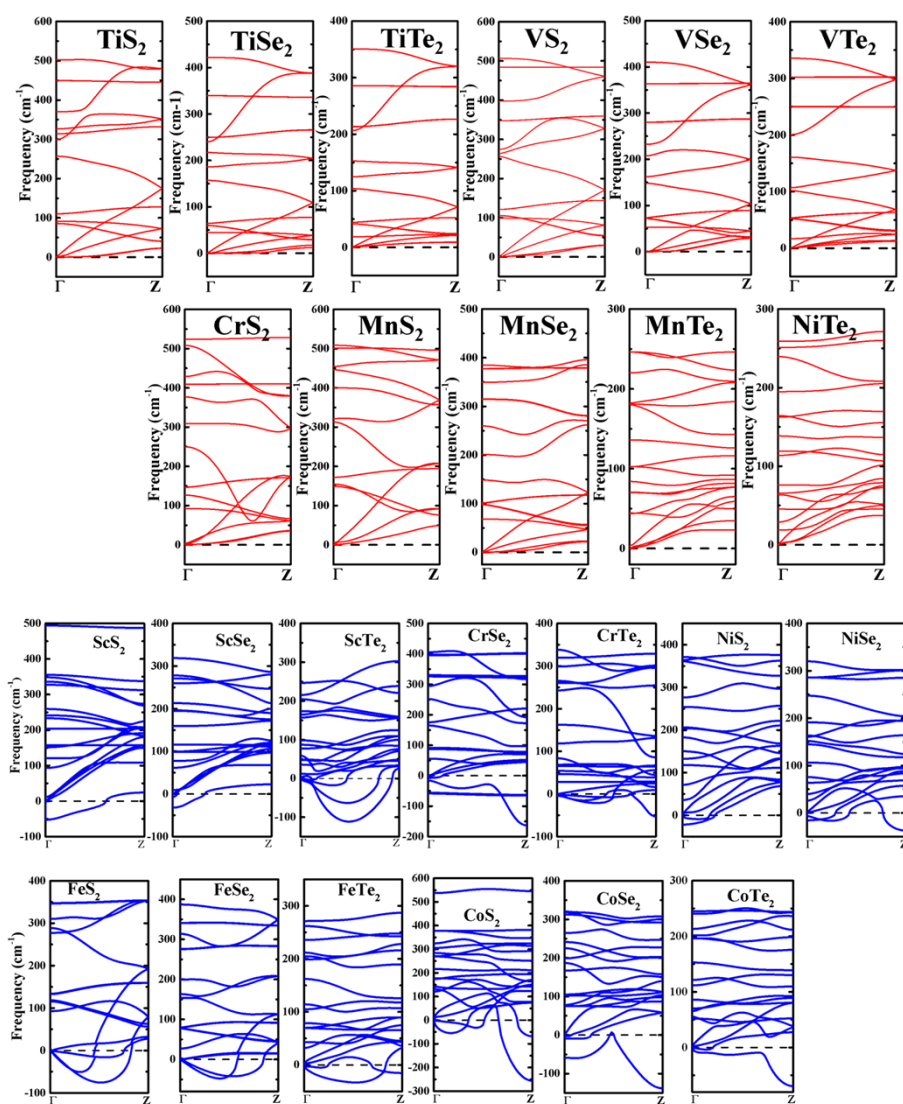

**Figure S1.** The calculated phonon dispersion spectra of  $MX_2$  chains.

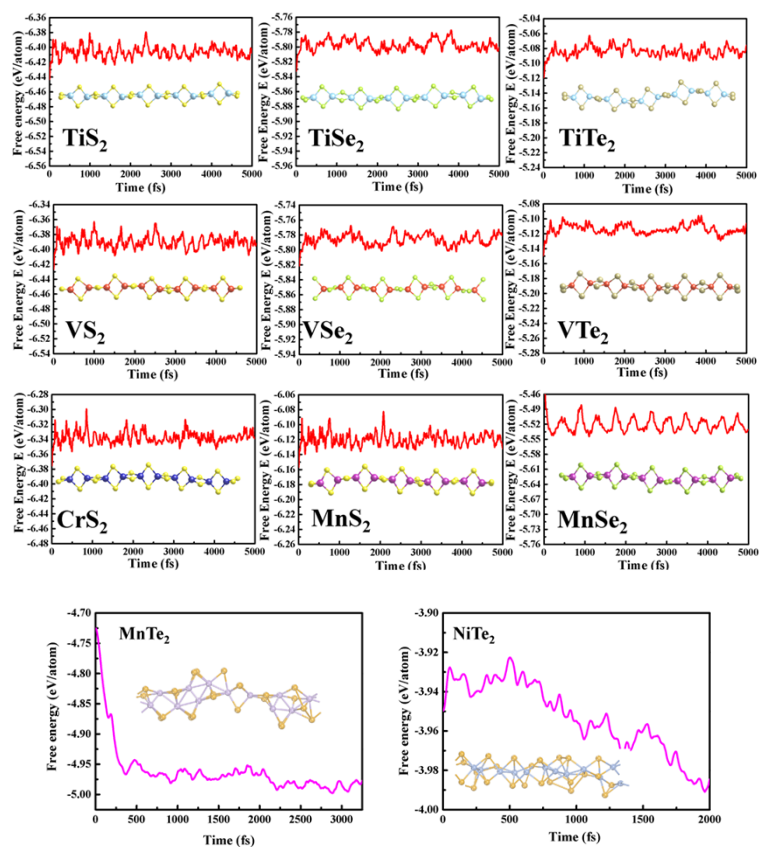

**Figure S2.** AIMD evolutions of total energy per atoms during simulations. The inset show the snapshot of  $\text{MX}_2$  chains at 300K after simulations.

**Table S3.** The lattice parameters and atomic coordinates of nanowires.

|                                           |                                                    |                                                    |                                                    |                                                    |                                                    |
|-------------------------------------------|----------------------------------------------------|----------------------------------------------------|----------------------------------------------------|----------------------------------------------------|----------------------------------------------------|
| Nanowire                                  | TiS <sub>2</sub>                                   | TiSe <sub>2</sub>                                  | TiTe <sub>2</sub>                                  | VS <sub>2</sub>                                    | VSe <sub>2</sub>                                   |
| Lattice<br>$\alpha=\beta=\gamma=90^\circ$ | $a = b = 25 \text{ \AA}$<br>$c = 6.17 \text{ \AA}$ | $a = b = 25 \text{ \AA}$<br>$c = 6.38 \text{ \AA}$ | $a = b = 25 \text{ \AA}$<br>$c = 6.72 \text{ \AA}$ | $a = b = 25 \text{ \AA}$<br>$c = 5.71 \text{ \AA}$ | $a = b = 25 \text{ \AA}$<br>$c = 5.90 \text{ \AA}$ |
| Atomic<br>coordinates                     | Ti(0.5 0.5 0.25)                                   | Ti(0.5 0.5 0.25)                                   | Ti(0.5 0.5 0.25)                                   | V(0.5 0.5 0.25)                                    | V(0.5 0.5 0.25)                                    |
|                                           | Ti(0.5 0.5 0.75)                                   | Ti(0.5 0.5 0.75)                                   | Ti(0.5 0.5 0.75)                                   | V(0.5 0.5 0.75)                                    | V(0.5 0.5 0.75)                                    |
|                                           | S(0.567 0.5 0.0)                                   | Se(0.573 0.5 0.0)                                  | Te(0.581 0.5 0.0)                                  | S(0.568 0.5 0.0)                                   | Se(0.573 0.5 0.0)                                  |
|                                           | S(0.433 0.5 0.0)                                   | Se(0.427 0.5 0.0)                                  | Te(0.419 0.5 0.0)                                  | S(0.432 0.5 0.0)                                   | Se(0.427 0.5 0.0)                                  |
|                                           | S(0.5 0.433 0.5)                                   | Se(0.5 0.427 0.5)                                  | Te(0.5 0.419 0.5)                                  | S(0.5 0.432 0.5)                                   | Se(0.5 0.427 0.5)                                  |
|                                           | S(0.5 0.567 0.5)                                   | Se(0.5 0.573 0.5)                                  | Te(0.5 0.581 0.5)                                  | S(0.5 0.568 0.5)                                   | Se(0.5 0.573 0.5)                                  |
| Nanowire                                  | VTe <sub>2</sub>                                   | CrS <sub>2</sub>                                   | MnS <sub>2</sub>                                   | MnSe <sub>2</sub>                                  |                                                    |
| Lattice<br>$\alpha=\beta=\gamma=90^\circ$ | $a = b = 25 \text{ \AA}$<br>$c = 6.19 \text{ \AA}$ | $a = b = 25 \text{ \AA}$<br>$c = 5.32 \text{ \AA}$ | $a = b = 25 \text{ \AA}$<br>$c = 5.23 \text{ \AA}$ | $a = b = 25 \text{ \AA}$<br>$c = 5.41 \text{ \AA}$ |                                                    |
| Atomic<br>coordinates                     | V(0.5 0.5 0.25)                                    | Cr(0.5 0.5 0.25)                                   | Mn(0.5 0.5 0.25)                                   | Mn(0.5 0.5 0.25)                                   |                                                    |
|                                           | V(0.5 0.5 0.75)                                    | Cr(0.5 0.5 0.75)                                   | Mn(0.5 0.5 0.75)                                   | Mn(0.5 0.5 0.75)                                   |                                                    |
|                                           | Te(0.581 0.5 0.0)                                  | S (0.567 0.5 0.0)                                  | S(0.566 0.5 0.0)                                   | Se(0.571 0.5 0.0)                                  |                                                    |
|                                           | Te(0.419 0.5 0.0)                                  | S(0.433 0.5 0.0)                                   | S(0.434 0.5 0.0)                                   | Se(0.429 0.5 0.0)                                  |                                                    |
|                                           | Te(0.5 0.419 0.5)                                  | S(0.5 0.433 0.5)                                   | S(0.5 0.434 0.5)                                   | Se(0.5 0.429 0.5)                                  |                                                    |
|                                           | Te(0.5 0.581 0.5)                                  | S(0.5 0.567 0.5)                                   | S(0.5 0.566 0.5)                                   | Se(0.5 0.571 0.5)                                  |                                                    |

**Table S4.** The formation energies of 1D nanowires with different stoichiometric ratio.

| Composition | M:X   |                         |                         | Composition | M:X   |                         |                         |
|-------------|-------|-------------------------|-------------------------|-------------|-------|-------------------------|-------------------------|
|             | 1:2   | 1:1 (Ref <sup>1</sup> ) | 1:3 (Ref <sup>2</sup> ) |             | 1:2   | 1:1 (Ref <sup>1</sup> ) | 1:3 (Ref <sup>2</sup> ) |
| <b>ScS</b>  | -1.13 | -1.52                   | /                       | <b>MnS</b>  | -0.41 | 0.24                    | /                       |
| <b>ScSe</b> | -1.02 | -1.34                   | /                       | <b>MnSe</b> | -0.23 | 0.36                    | /                       |
| <b>ScTe</b> | -0.53 | -0.95                   | /                       | <b>MnTe</b> | 0.01  | 0.61                    | /                       |
| <b>TiS</b>  | -1.09 | -1.14                   | -1.04                   | <b>FeS</b>  | -0.26 | -0.35                   | /                       |
| <b>TiSe</b> | -0.89 | -0.95                   | -0.83                   | <b>FeSe</b> | -0.15 | -0.26                   | /                       |
| <b>TiTe</b> | -0.42 | -0.57                   | -0.51                   | <b>FeTe</b> | 0.07  | /                       | /                       |
| <b>VS</b>   | -0.76 | -0.78                   | -0.65                   | <b>CoS</b>  | -0.18 | -0.27                   | /                       |
| <b>VSe</b>  | -0.58 | -0.61                   | -0.46                   | <b>CoSe</b> | -0.11 | -0.20                   | /                       |
| <b>VTe</b>  | -0.15 | -0.31                   | -0.16                   | <b>CoTe</b> | 0.02  | -0.05                   | /                       |
| <b>CrS</b>  | -0.45 | -0.55                   | /                       | <b>NiS</b>  | -0.13 | -0.31                   | /                       |
| <b>CrSe</b> | -0.27 | -0.41                   | /                       | <b>NiSe</b> | -0.11 | -0.25                   | /                       |
| <b>CrTe</b> | 0.16  | -0.17                   | /                       | <b>NiTe</b> | 0.07  | -0.13                   | /                       |



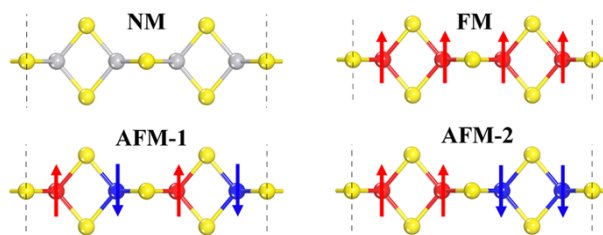

**Figure S3.** Various spin configurations including nonmagnetic (NM), ferromagnetic (FM) and two anti-ferromagnetic (AFM) states. The majority spin and minority spin on the metal atoms are represented by red and blue arrows, respectively.

**Table S5.** The relative energies (meV/M) between FM, NM, and AFM states.

| Chain                   | NM   |       | AFM-1 |       | AFM-2 |       | G.S   |       |
|-------------------------|------|-------|-------|-------|-------|-------|-------|-------|
|                         | PBE  | HSE06 | PBE   | HSE06 | PBE   | HSE06 | PBE   | HSE06 |
| <b>VS<sub>2</sub></b>   | 244  | 558   | 210   | 170   | 147   | 311   | FM    | FM    |
| <b>VSe<sub>2</sub></b>  | 218  | 546   | 196   | 257   | 155   | 342   | FM    | FM    |
| <b>VTe<sub>2</sub></b>  | 208  | 776   | 189   | 426   | 170   | 232   | FM    | FM    |
| <b>CrS<sub>2</sub></b>  | 11   | 184   | 10    | 62    | 12    | 165   | FM    | FM    |
| <b>MnS<sub>2</sub></b>  | -213 | 444   | -224  | -540  | -154  | -283  | AFM-1 | AFM-1 |
| <b>MnSe<sub>2</sub></b> | 39   | 596   | -8    | -709  | 36    | -323  | AFM-1 | AFM-1 |

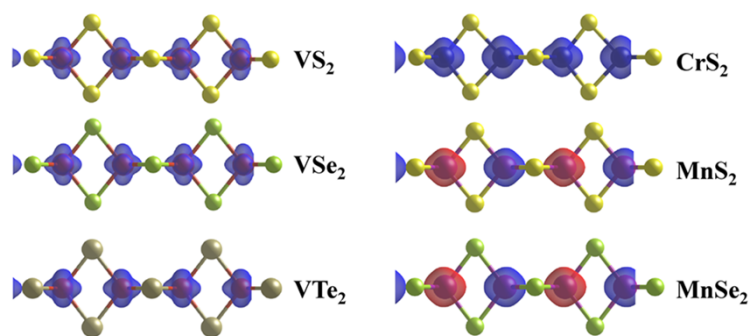

**Figure S4.** Lateral views of spin charge density distribution on MX<sub>2</sub> chains with an isovalue of 0.02 e/Bohr<sup>3</sup>. The majority and minority spin densities are shaded in blue and red colors, respectively.

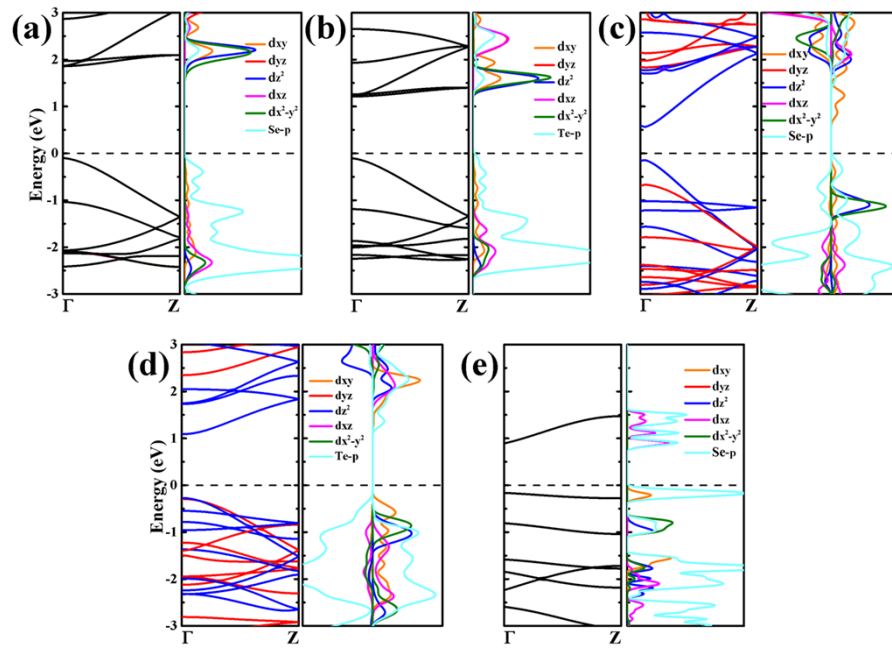

**Figure S5.** The projected band structures and density of states of (a)  $\text{TiSe}_2$ , (b)  $\text{TiTe}_2$ , (c)  $\text{VSe}_2$ , (d)  $\text{VTe}_2$  and (e)  $\text{MnSe}_2$  chains.

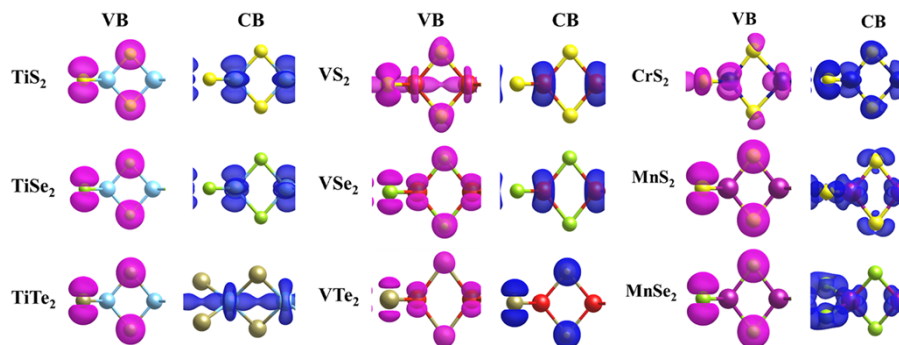

**Figure S6.** The partial charge density of the valence band maximum (VBM) and conduction band minimum (CBM) for  $\text{MX}_2$  atomic chains are plotted by purple and blue colors with an isovalue of  $5 \times 10^{-3}$ .

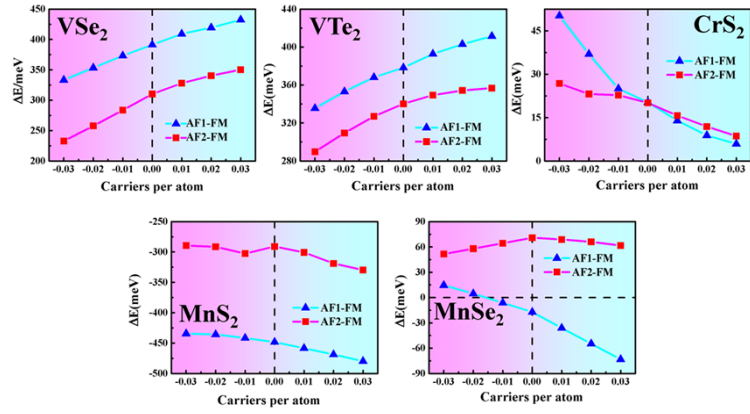

**Figure S7.** The energy difference between AFM and FM states of MX<sub>2</sub> chains with carrier injection.

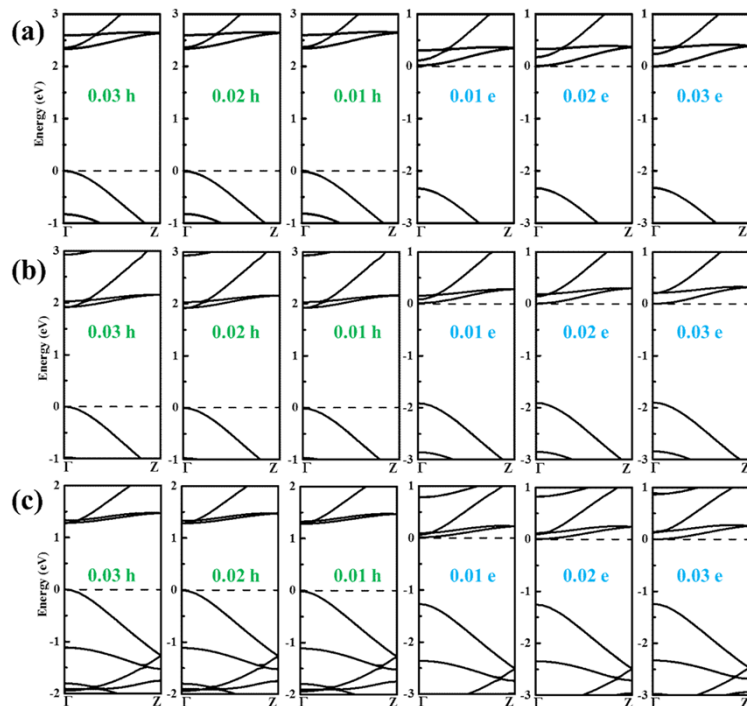

**Figure S8.** The band structures of (a)  $\text{TiS}_2$ , (b)  $\text{TiSe}_2$ , and (c)  $\text{TiTe}_2$  chains with carrier injection.

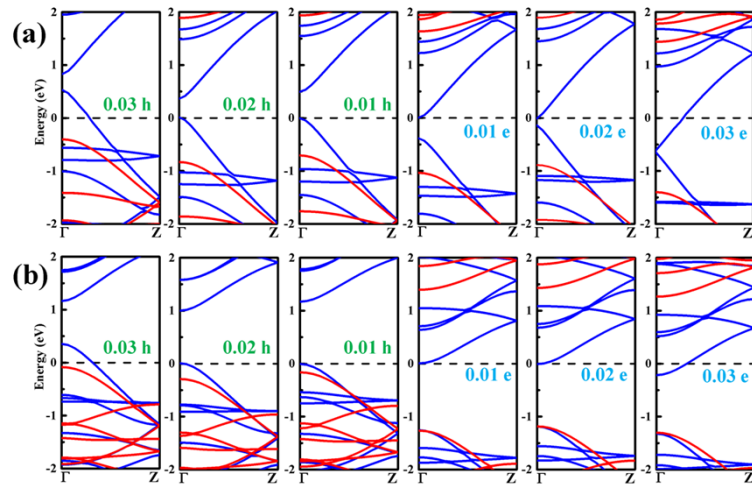

**Figure S9.** The band structures of (a) VSe<sub>2</sub> and (b) VTe<sub>2</sub> chains with carrier injection.



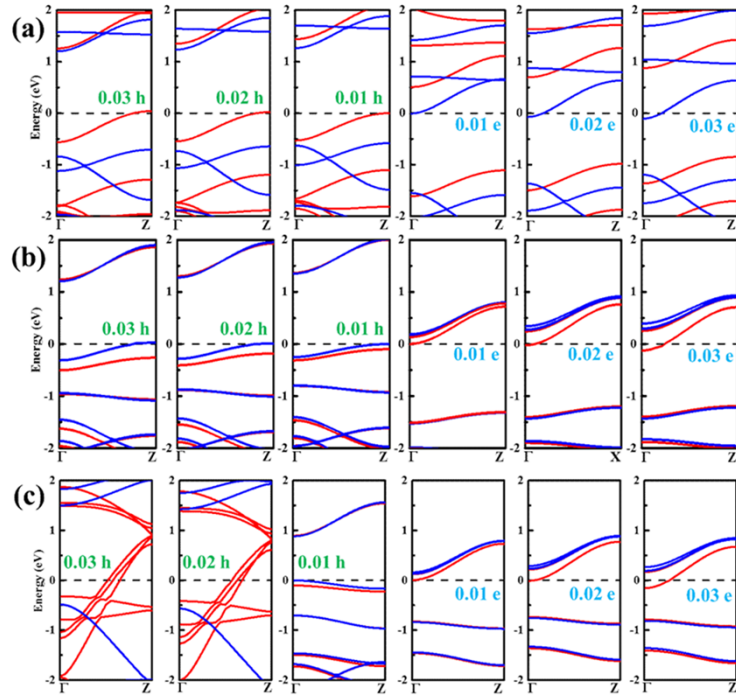

**Figure S10.** The band structures of (a)  $\text{CrS}_2$ , (b)  $\text{MnS}_2$ , and (c)  $\text{MnSe}_2$  chains with carrier injection.

**Table S6.** Calculated magnetic anisotropy energy ( $\mu\text{eV}/\text{metal}$ ) of  $\text{MX}_2$  chains. EA refers to the easy magnetization axis.

| <b>Chain</b>                      | <b>E[001] - E[100]</b> | <b>EA</b> |
|-----------------------------------|------------------------|-----------|
| <b><math>\text{VS}_2</math></b>   | -51.7                  | [001]     |
| <b><math>\text{VSe}_2</math></b>  | -588.4                 | [001]     |
| <b><math>\text{VTe}_2</math></b>  | -3784.2                | [001]     |
| <b><math>\text{CrS}_2</math></b>  | 19.0                   | [100]     |
| <b><math>\text{MnS}_2</math></b>  | 122.1                  | [100]     |
| <b><math>\text{MnSe}_2</math></b> | -807.1                 | [001]     |

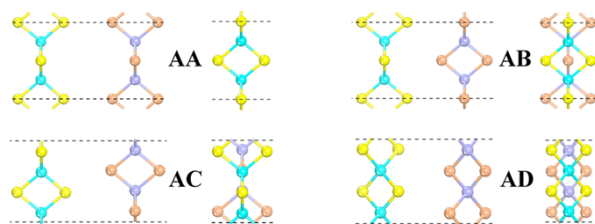

**Figure S11.** The four types of inter-chain stacking configurations. The top and side views are displayed in left and right panels, respectively. The adjacent chain is shown with different colors.

**Table S7.** The calculated total energies (eV/metal), inter-chain coupling energy ( $E_c = E_{\text{bundle}} - 2E_{\text{chain}}$ , meV/metal) and energy difference between inter-chain FM and inter-chain AFM states ( $\Delta E = E_{\text{AFM}} - E_{\text{FM}}$ , meV/metal).

|                        | AA-stacking |         | AB-stacking |         | AC-stacking |         | AD-stacking |         | $\square E$ |            |
|------------------------|-------------|---------|-------------|---------|-------------|---------|-------------|---------|-------------|------------|
|                        | FM          | AFM     | FM          | AFM     | FM          | AFM     | FM          | AFM     | Ec          | $\Delta E$ |
| <b>VS<sub>2</sub></b>  | -78.499     | -78.498 | -78.601     | -78.612 | -78.530     | -78.528 | -78.612     | -78.613 | -166        | -0.3       |
| <b>VSe<sub>2</sub></b> | -71.468     | -71.466 | -71.589     | -71.597 | -71.505     | -71.506 | -71.614     | -71.697 | -232        | -20.6      |
| <b>VTe<sub>2</sub></b> | -63.651     | -63.652 | -63.810     | -63.823 | -63.816     | -63.704 | -64.000     | -63.891 | -318        | 27.3       |
| <b>CrS<sub>2</sub></b> | -77.169     | -77.162 | -77.303     | -77.293 | -77.210     | -77.301 | -77.394     | -77.452 | -256        | -14.4      |

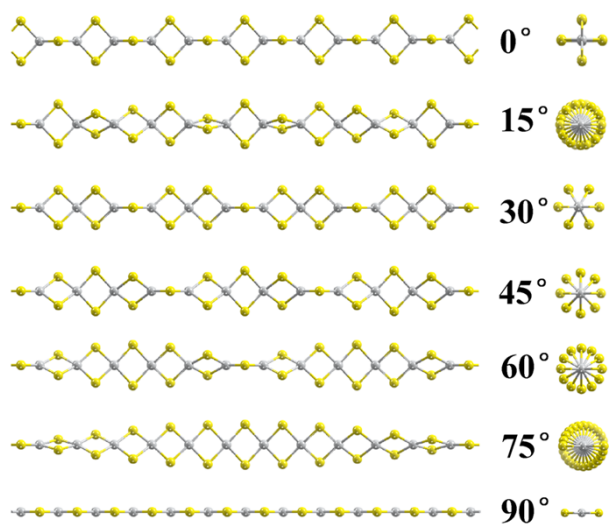

**Figure S12.** Atomic structures of twisted single chain  $\text{TiS}_2$  nanowires. The side and front views are shown in left and right panels, respectively.

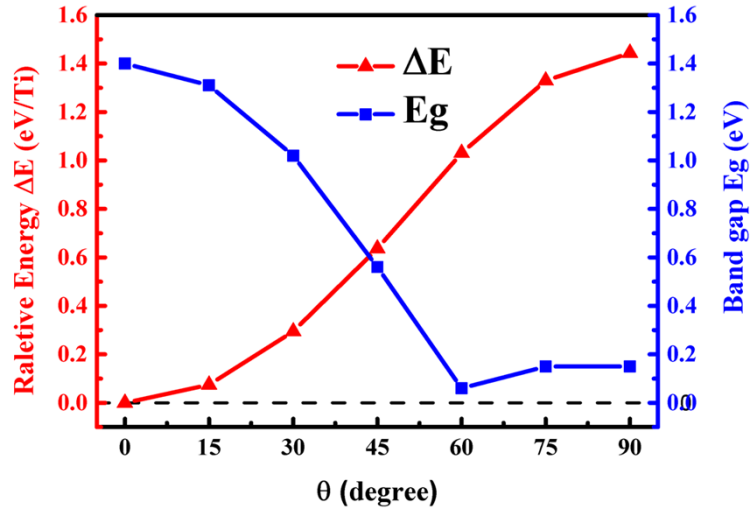

**Figure S13.** Variation of the total energy per metal and energy gap of twisted  $\text{TiS}_2$  nanowire with the rotation angle.

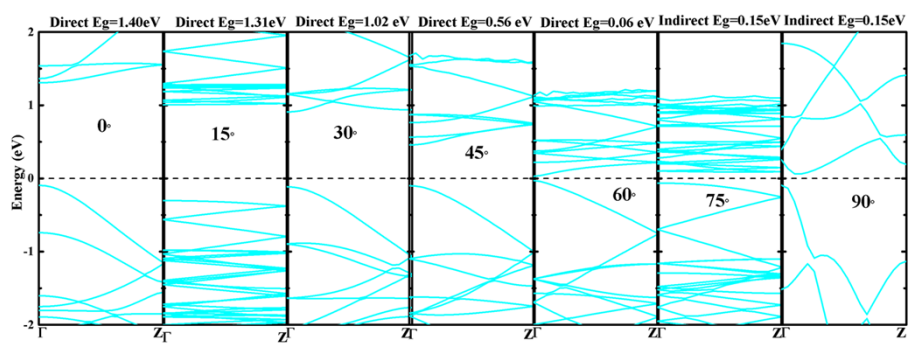

**Figure S14.** The band structure of twisted  $\text{TiS}_2$  nanowire with different rotation angle at PBE level.

**Table S8.** The unit cell lattice constant  $L$  (Å) of chain and CNT, the supercells of chains (m) and CNT (n) used to construct heterostructures, and the lattice mismatch between chain and CNT. The “+” and “-” represent tensile and compressive strains, respectively.

| CNT@Chain               | Chain | CNT  | Supercell           | Mismatch (%) |
|-------------------------|-------|------|---------------------|--------------|
|                         | L     | L    | (Chain) m : n (CNT) |              |
| <b>TiS<sub>2</sub></b>  | 6.17  | 2.46 | 2:5                 | +0.4         |
| <b>TiSe<sub>2</sub></b> | 6.37  | 2.46 | 2:5                 | +3.7         |
| <b>TiTe<sub>2</sub></b> | 6.72  | 2.46 | 3:8                 | +2.4         |
| <b>VS<sub>2</sub></b>   | 5.71  | 2.46 | 3:7                 | -0.4         |
| <b>VSe<sub>2</sub></b>  | 5.90  | 2.46 | 3:7                 | +2.9         |
| <b>VTe<sub>2</sub></b>  | 6.19  | 2.46 | 2:5                 | +0.6         |
| <b>CrS<sub>2</sub></b>  | 5.32  | 2.46 | 4:9                 | -3.9         |
| <b>MnS<sub>2</sub></b>  | 5.23  | 2.46 | 4:9                 | -5.5         |
| <b>MnSe<sub>2</sub></b> | 5.41  | 2.46 | 4:9                 | -2.2         |



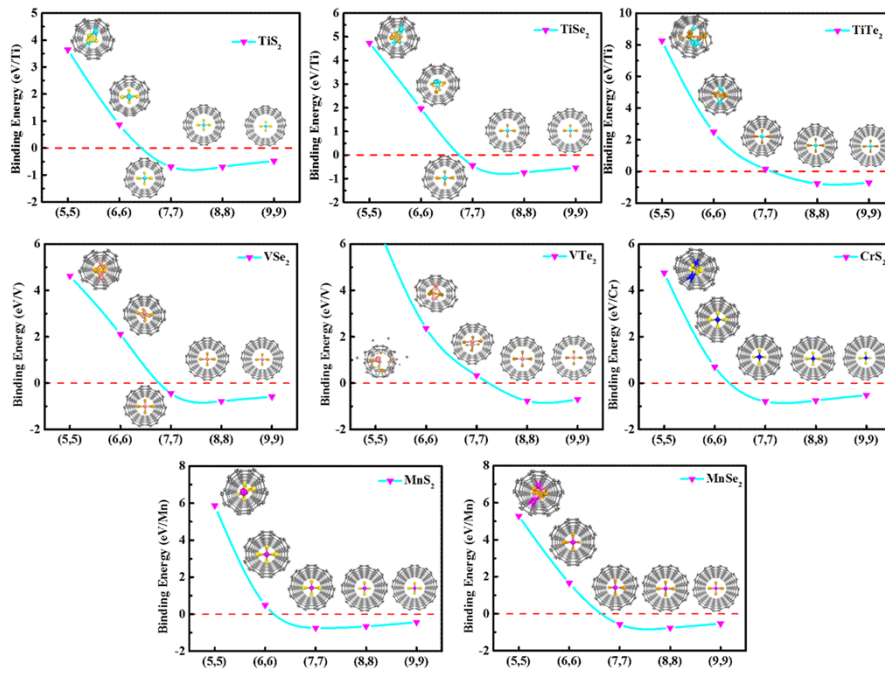

**Figure S15.** The evolution of binding energy with diameter of CNT. The inset shows front views of  $\text{MX}_2$  chains embedded in CNT.

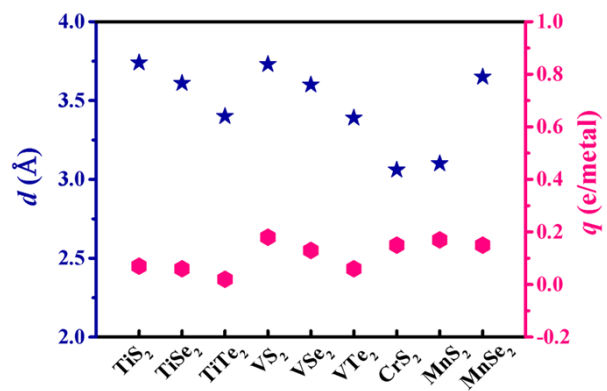

**Figure S16.** The separation  $d$  between chain and CNT, and charge transfer  $q$  ( $e/\text{metal}$ ) from CNT to chain.

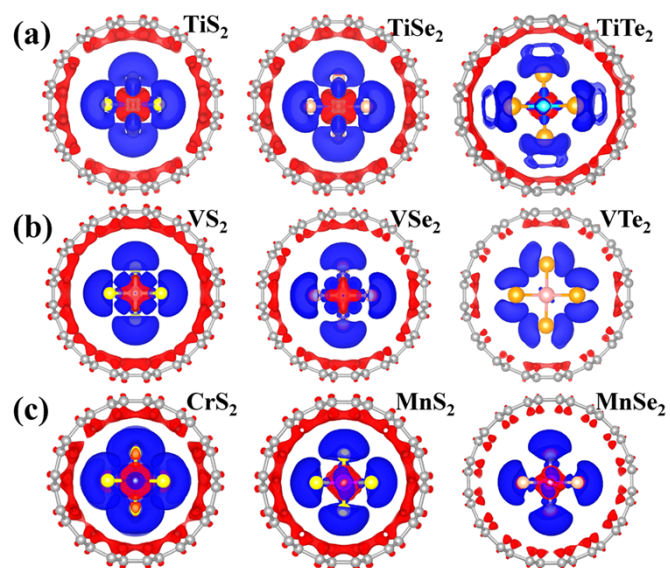

**Figure S17.** Electron density transferred from the CNT to the inside MX<sub>2</sub> chains. Isovalues are set as  $2 \times 10^{-4}$ ,  $4 \times 10^{-4}$ , and  $5 \times 10^{-4}$  e/Bohr<sup>3</sup> for (a) TiX<sub>2</sub>, (b) VX<sub>2</sub>, and (c) MnX<sub>2</sub> single-chain embedded inside CNT. Electron accumulation and depletion are shaded in blue and red, respectively.

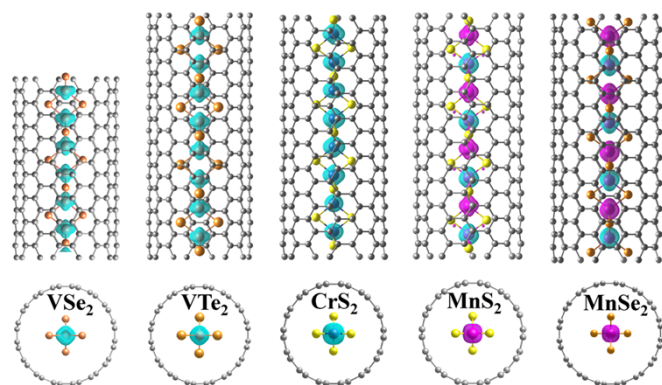

**Figure S18.** The spin charge density distribution in joint system. The majority and minority spin charge density are displayed in cyan and purple, respectively.

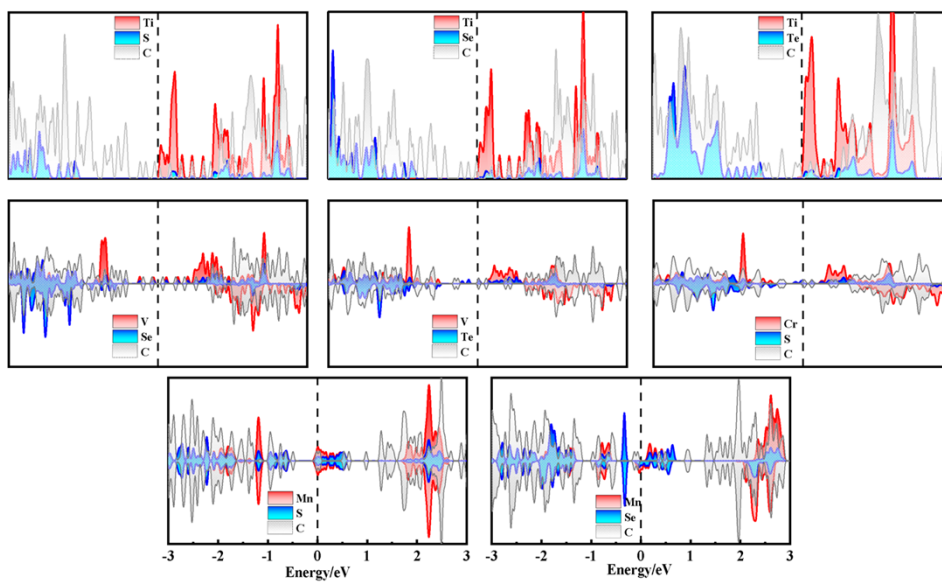

**Figure S19.** The projected density of states of  $\text{MX}_2$  chains encapsulated inside CNT.

Reference:

1. C. Shang, L. Fu, S. Zhou and J. Zhao, *JACS Au*, 2021, **1**, 147-155.
2. S. Stonemeyer, J. D. Cain, S. Oh, A. Azizi, M. Elasha, M. Thiel, C. Song, P. Ercius, M. L. Cohen and A. Zettl, *Journal of the American Chemical Society*, 2021, **143**, 4563-4568.
